# Supplementary material for: Cervical cancer screening coverage in the Americas region: a synthetic analysis
Source: PubMed Central journal article supplement — Lancet Reg Health Am. 2024 Feb 4;30:100689. doi: 10.1016/j.lana.2024.100689 (PMC10850953; doi:10.1016/j.lana.2024.100689), 2024-02-04
Supplement: mmc2.pdf [file mmc2.pdf]

**Editorial Disclaimer:** *This translation in Spanish was submitted by the authors and we reproduce it as supplied. It has not been peer-reviewed. Our editorial processes have only been applied to the original abstract in English, which should serve as a reference for this manuscript.*

## Resumen

**Antecedentes:** a nivel mundial, en la región de Las Américas se encuentra la mortalidad por cáncer de cérvix (CC) más baja (Norteamérica) y la segunda más alta (América Latina y Caribe). La falta de información de cobertura de tamizaje confiable dificulta el monitoreo de la iniciativa de eliminación del CC de la OMS.

**Métodos:** se buscó información sobre cobertura de tamizaje en fuentes oficiales y encuestas nacionales de salud, complementada con una consulta formal de la OMS a los países. Se obtuvieron datos de contexto de fuentes oficiales (ingreso, gasto en salud, índice de desarrollo humano, cobertura en salud, incidencia/mortalidad). Se estimaron coberturas nacionales por edad según intervalos de tamización para 2019. Se imputaron datos faltantes mediante un algoritmo secuencial. Se utilizó regresión Beta y de Poisson para analizar la asociación entre variables contextuales, cobertura de tamizaje y mortalidad por CC.

**Resultados:** se incluyeron 37 países. Se encontró información predominantemente sobre citología e insuficiente para pruebas de VPH. En total, 78%, 34%, 60% y 67% de mujeres entre 25-65 años han sido tamizadas alguna vez en la vida, el último año, los últimos tres años o los últimos 5 años, respectivamente. La cobertura de citología en los últimos 3 años varía entre 48% (Suramérica) y 72% (Norteamérica). En 24 países la cobertura fue menor a 70%. El ingreso y el tipo de sistema de salud se asocian con la cobertura, pero la cobertura no mostró asociación con la mortalidad.

**Interpretación:** en la región de las Américas el 35,1% y 56,8% de los países reportaron una cobertura mayor a 70% para los intervalos de 3 y 5 años, respectivamente. La inequidad continúa siendo un gran desafío en la región. La campaña de eliminación debe enfatizar la transición hacia las pruebas de VPH y el fortalecimiento de los sistemas de monitoreo.

**Financiamiento:** Instituto de Salud Carlos III, Fondo Europeo de Desarrollo Regional, Secretaría de Universidades e Investigación del Departamento de Negocios y Conocimiento de la Generalitat de Cataluña y Horizonte 2020.
